1                   **Effectiveness of shared medical appointments delivered in primary care for**  
2                   **improving health outcomes in patients with long-term conditions: a systematic**  
3                   **review of randomised controlled trials**  
4  
5

6 <sup>1</sup>Mei Yee Tang, meiyee.tang@newcastle.ac.uk\*\*

7 <sup>2</sup>Fiona Graham, fiona.graham@newcastle.ac.uk<sup>+</sup>

8 <sup>2</sup>Amy O'Donnell, amy.odonnell@newcastle.ac.uk

9 <sup>3</sup>Fiona Beyer, fiona.beyer@newcastle.ac.uk

10 <sup>3</sup>Catherine Richmond, catherine.richmond@newcastle.ac.uk

11 <sup>2,4</sup>Falko Sniehotta, falko.sniehotta@medma.uni-heidelberg.de

12 <sup>1</sup>Eileen Kaner, eileen.kaner@newcastle.ac.uk

13

14 <sup>1</sup> School of Psychology, Dame Margaret Barbour Building, Wallace Street, Newcastle  
15 University, Newcastle upon Tyne, NE2 4DR, UK

16 <sup>2</sup>NIHR Policy Research Unit in Behavioural Science, Population Health Sciences Institute,  
17 Baddiley-Clark Building, Richardson Road, Newcastle University, Newcastle upon Tyne,  
18 NE2 4AX, UK

19 <sup>3</sup>Population Health Sciences Institute, Baddiley-Clark Building, Richardson Road, Newcastle  
20 University, Newcastle upon Tyne, NE2 4AX, UK

21 <sup>4</sup>Department of Public Health, Preventive and Social Medicine, Heidelberg University,  
22 Heidelberg, DE

23

24

25 \*Corresponding author

26 <sup>+</sup> Joint co-first authors

27

28

29 **KEYWORDS:** *shared medical appointments, long-term conditions, systematic review, meta-*  
30 *analysis*

31

32 **WORD COUNT**

33 4417

34

35

36

37

38

39

40

41

42

43

44

45

46

47

48

49

50

51

52

53

54

55 **ABSTRACT**

56 **Objectives**

57 Shared medical appointments (SMAs) have the potential to address interlinked challenges of  
58 limited capacity in primary healthcare and rising prevalence of patients with multiple long-  
59 term conditions (LTCs). This review aimed to examine the effectiveness of SMAs compared  
60 to one-to-one appointments in primary care at improving health outcomes and reducing  
61 demand on healthcare services.

62  
63 **Methods**

64 We searched for randomised controlled trials (RCTs) of SMAs involving patients with LTCs  
65 in primary care across six databases from 2013-2020 and added eligible papers identified  
66 from previous relevant reviews. Data were extracted and outcomes narratively synthesised,  
67 meta-analysis was undertaken where possible.

68  
69 **Results**

70 Twenty-three unique trials were included. SMA models varied in terms of components, mode  
71 of delivery and target population. Most trials recruited patients with a single LTC, most  
72 commonly diabetes ( $n=12$ ), although eight trials selected patients with multiple LTCs. There  
73 was substantial heterogeneity in outcome measures which we categorised into health  
74 outcomes (biomedical indicators, psychological and well-being measures), healthcare  
75 utilisation, and cost and resource use. Meta-analysis showed that participants in SMA  
76 groups had lower diastolic blood pressure than those in usual care ( $d=-0.123$ ,  $95\%CI = -$   
77  $0.22, -0.03$ ,  $n=8$ ). No statistically significant differences were found across other outcomes.  
78 Compared with usual care, SMAs had no significant effect on healthcare service use.

79  
80 **Conclusions**

81 SMAs were at least as effective as usual care in terms of health outcomes and did not lead  
82 to increased healthcare service use in the short-term. To strengthen the evidence base,  
83 future studies should target standardised behavioural and health outcomes and clearly  
84 report SMA components so key behavioural ingredients can be identified. Similarly,  
85 transparent approaches to measuring costs would improve comparability between studies.  
86 To better understand SMA's potential to reduce demand on healthcare services, further  
87 investigation is needed as to how SMAs can be best incorporated in the patient care  
88 pathway.

89  
90 **PROSPERO protocol registration: CRD42020173084**

91

92 299/300

93

94

95

96

97

98

99

100

101

102

103

## 104 **STRENGTHS AND LIMITATIONS**

- 105 • Focus on randomised controlled trials, highest quality evidence of the effectiveness
- 106 of SMAs in primary care for long term conditions
- 107 • Robust search strategy, based on previous high-quality review; refined by
- 108 information specialists to focus on primary care
- 109 • Rapidly evolving area of practice and publications and the most recent evidence may
- 110 be missing.
- 111 • Small number of studies reported resource use and costs limiting conclusions
- 112 regarding efficacy of SMAs in primary care.

113

## 114 **FUNDING**

115 This paper is independent research commissioned and funded by the NIHR PRU in  
116 Behavioural Science (Award: PR-PRU-1217-20501). The views expressed in this publication  
117 are those of the authors and not necessarily those of the NHS, the National Institute for  
118 Health Research, the Department of Health and Social Care or its arm's length bodies, and  
119 other Government Departments. The funders had no role in the design of the study,  
120 collection, analysis or interpretation of data or in the writing of the manuscript.

121

## 122 **COMPETING INTERESTS**

123 None to declare.

124

## 125 **CHECKLIST**

126 See supplementary material for PRISMA checklist.

127

128

129

130

131

132

133

134

135

136

137

138

139

## 140 INTRODUCTION

141 Shared Medical Appointments (SMAs), also known as group consultations, are a model of  
142 care with the potential to address the interlinked challenges of limited capacity in primary  
143 care and rising prevalence of patients with multiple long-term conditions (LTCs)[1,2]. SMAs  
144 are longer appointments (typically 60-120 minutes) whereby patients with the same LTCs  
145 meet with their physician together[3]. SMAs are typically co-led and/or facilitated by  
146 healthcare professionals, such as nurses, pharmacists, psychologists, and physiotherapists.  
147 The group typically consists of between 6-15 patients and may include family members and  
148 caregivers[4,5]. There are various models of SMA but generally they retain some features of  
149 a standard one-to-one appointment such as physical examinations and personalised review  
150 of medical charts[2]. In addition, SMAs provide participants an opportunity to ask questions  
151 of clinicians and other patient and receive formal education and counselling during the group  
152 session. SMAs have been used to deliver care for a range of health conditions including  
153 diabetes, hypertension, and chronic pain; though there is potential for wider application,  
154 including multimorbidity[6].

155

156 A recent synthesis of qualitative literature found that most patients and primary care  
157 practitioners regarded SMAs positively[6]. Key benefits included improved patient self-  
158 confidence and motivation for self-management; whilst practitioners felt that SMAs had the  
159 potential to provide a more efficient and effective way of delivering care[7]. Previous reviews  
160 of effectiveness were inconclusive but evidence, largely from the United States (US) and  
161 Australia, reported a promising effect of SMAs for some biomedical measures. For example,  
162 improvements in glycated haemoglobin A1C (HbA1C) and systolic blood pressure (SBP)  
163 were greater in patients attending SMAs compared to usual care for diabetes[8,9]. However,  
164 previous reviews include studies that evaluate the use of SMAs in secondary care settings  
165 as follow-up appointments to specialist treatment [4]. A mixed-methods review of SMAs in  
166 primary care settings for non-specialist treatment concluded that SMAs can yield  
167 improvements in patient satisfaction and some biophysical markers of disease [5]. However,  
168 this review conducted in 2015 included studies of SMAs for non-LTCs. It remains unclear  
169 whether SMAs are effective in supporting improved ongoing management of LTCs in  
170 primary care.

171

172 This review examined the effects of SMAs delivered in primary care on health outcomes and  
173 healthcare service use in patients with LTCs. We sought to answer two overarching  
174 research questions:

175

- 176        1. **Are SMAs effective in improving health outcomes for patients with one or more**  
 177            **long-term conditions?**  
 178        2. **Do SMAs reduce healthcare service use by patients with one or more long-**  
 179            **term conditions?**

180        **METHOD**

181        This systematic review follows Cochrane Handbook Guidance[10] and the Preferred  
 182        Reporting Items for Systematic Reviews and Meta-Analyses (PRISMA) guidelines[11].

183

184        **Protocol and registration**

185        This study was registered on PROSPERO ([CRD42020173084](https://doi.org/10.1111/1747-7528.123084)). Regarding protocol  
 186        changes, we proposed coding of Behaviour Change Techniques Taxonomy V1  
 187        (BCTTv1)[12] used in SMAs and associated with changes in outcomes. However, most  
 188        included studies did not report the required detail and so instead we narratively described  
 189        this information.

190

191        **Inclusion/exclusion criteria**

192        Studies were included if they met the criteria outlined in Table 1. The focus of this review  
 193        was on models of SMAs that include one-to-one time for every patient in attendance as per  
 194        the description of group consultations reported previously [1,2].

195

196        Table 1: Inclusion and exclusion criteria

| PICOS Criterion                     | Description                                                                                                                                                                                                                            |
|-------------------------------------|----------------------------------------------------------------------------------------------------------------------------------------------------------------------------------------------------------------------------------------|
| <b>Population</b>                   | Adult patients ( $\geq 18$ years of age) with one or more long-term conditions who have attended at least one shared medical appointment (SMA) in a primary care setting were eligible for inclusion.                                  |
|                                     | Patients in primary care settings who were seen by a secondary care specialist during the SMA were excluded.                                                                                                                           |
| <b>Intervention (Model of care)</b> | All countries were eligible for inclusion. SMAs/group consultations/group visits conducted in primary care setting, delivered by a primary care healthcare professional (e.g. nurse, doctor, pharmacist), were eligible for inclusion. |
|                                     | The present review considered SMAs to be clinical encounters in which groups of patients with the same/similar long-term condition meet with a healthcare professional for routine care.                                               |
| <b>Comparison/control</b>           | The SMA must have included one-to-one time for every patient in attendance. Therefore, peer support groups were excluded. No restrictions – usual care, active control (e.g., another SMA model).                                      |
| <b>Outcomes</b>                     | Behavioural outcomes – e.g., healthcare utilisation, physical activity, medication adherence. Disease-specific measures – e.g., Haemoglobin A1C (HbA1C). Biophysical health indicators – e.g., cholesterol, weight, BMI.               |

---

|                     |                                                                                                                                                                                        |
|---------------------|----------------------------------------------------------------------------------------------------------------------------------------------------------------------------------------|
| <b>Study design</b> | Cost/resource use.<br>Other outcomes- e.g. psychological and wellbeing<br>Only randomised controlled trials that were published in peer-reviewed journals were eligible for inclusion. |
|---------------------|----------------------------------------------------------------------------------------------------------------------------------------------------------------------------------------|

---

197

198

199

### **Search strategy**

200 A comprehensive search strategy was developed, based on the approach described in  
201 Booth et al.[13], to search for trials published after their search, namely the period 2013-  
202 2020. Key changes included the removal of the terms “group outpatient”, “GMV” or “GMA”,  
203 “group processes” and “Group care” to improve the sensitivity and specificity of the search  
204 (see S1). The search strategy was first used to search MEDLINE (via OVID) and then  
205 translated for the following databases: EMBASE (via OVID), Science citation index (via Web  
206 of Knowledge) Social Science Citation Index (via Web of Knowledge), Cumulative Index to  
207 Nursing and Allied Health Literature (via EBSCOhost), Cochrane Central Register of  
208 Controlled Trials (Wiley), DARE, NHS EED, and HTA (Centre for Reviews and  
209 Dissemination). Any relevant pre-2013 trials identified by forward and backward citation  
210 searches of the included trials, including those in relevant systematic reviews[4,6,14,15],  
211 were also included in the review.

212

213

### **Screening**

214 Screening and data extraction was facilitated using the systematic review management tool,  
215 Covidence[16]. Two reviewers independently screened all titles and abstracts against the  
216 inclusion criteria, and a third reviewer adjudicated any disagreements. This process was  
217 also applied to the screening of full-text papers.

218

219

### **Data extraction**

220 Information relating to the study design, population, and intervention were extracted based  
221 on a framework on form of delivery[17] (e.g. experience/training of the providers and  
222 facilitators), outcomes, and results were extracted from all relevant papers using a data  
223 extraction form (see S2). All information was double-extracted by two researchers, with  
224 disagreements resolved through discussion or third-party moderation.

225

226

227

228

229

230

Where data were reported for several time-points, the data-point closest to the end of the  
SMA intervention was used to calculate the effect size as this would be when the largest  
effects attributable to the SMA is expected. If available, intention-to-treat data were used to  
calculate effect sizes.

231

232

### 233 **Quality assessment**

234 Two researchers independently assessed the quality of all included studies using the  
235 Cochrane Risk of Bias Tool[18]. Percentages of judgements (high, low, or unclear) for each  
236 domain was calculated across the studies.

237

### 238 **Data analysis/synthesis**

239 We mapped all reported outcomes into the following categories agreed by the wider  
240 research team to best reflect SMA effectiveness and efficiency: health outcomes (biomedical  
241 indicators, psychological and well-being measures), healthcare utilisation and cost and  
242 resource use.

243

244 Meta-analyses were performed in StataC 15. Given the heterogeneity between studies, a  
245 random-effects model was used[19]. Meta-analyses were conducted where there were at  
246 least two studies reporting a specific outcome[20]. Outcome effect sizes were calculated as  
247 Cohen's *d* (standardised mean difference). Heterogeneity was assessed using Higgins I-  
248 Square ( $I^2$ ), whereby 50-90% was considered as representing substantial heterogeneity[21].  
249 Authors were contacted for additional information if data needed to calculate effect sizes  
250 were not sufficiently reported in the published paper(s). Where this information could not be  
251 obtained from authors, *p*-values and confidence intervals were used to calculate effect  
252 sizes[10]. Only studies in which the comparator was usual care were pooled into the meta-  
253 analysis.

254

255 Using meta-regression, sensitivity analyses were conducted to explore whether results  
256 differed according to sources of bias identified from the risk of bias assessment.

257

258 Studies that were too heterogeneous to perform meta-analysis, and where the comparator  
259 was not usual care, were synthesised narratively. Extracted data was tabulated by outcome  
260 measure to enable comparisons and relationships across studies to be more easily  
261 examined [22]. For each outcome measure, evidence of an effect was determined by the *p*-  
262 values reported in the papers. To assess the certainty of the evidence, number of study  
263 participants, confidence intervals and the consistency of effects across studies, the risk of  
264 bias of the studies, how directly the included studies address the planned question  
265 (directness) were taken into consideration.

266

### 267 **Patient and Public Involvement**

268 The PRU BehSci Public Patient Involvement group provided their patient perspective about  
269 outcome measures of interests.

270

## 271 **RESULTS**

272 <Figure 1 – PRISMA diagram of study selection process here>

273

### 274 **Characteristics of the included studies**

275 Twenty-three unique trials (reported in thirty-four papers) were identified, for PRISMA details  
276 see Figure 1 and Table 2. See S3 for list of included papers.



Table 2: Characteristics of included studies grouped by health condition(s)

| Study                                                                          | Condition(s)                   | Country   | Setting                                                                                  | Sample size (N) | Model                              | Comparator                                                                |
|--------------------------------------------------------------------------------|--------------------------------|-----------|------------------------------------------------------------------------------------------|-----------------|------------------------------------|---------------------------------------------------------------------------|
| <b>Scott (2004)</b> [23]<br>Coleman (2001)[24]                                 | ^Chronic conditions            | USA       | Large health maintenance organisation                                                    | 295             | CHCC model-'group visits'          | Usual care                                                                |
| <b>Gardiner (2017)</b> [25]<br>Gardiner (2019)[26]                             | Chronic pain and depression    | USA       | Community Health Centres serving low-income, racially and ethnically diverse populations | 159             | Integrated medical group visit     | Usual care                                                                |
| Berry (2016)[27]                                                               | Diabetes (Type 2)              | USA       | Community-based health center serving low-income population who are working              | 80              | Group visits                       | Usual care                                                                |
| <b>Clancy 2003a</b> [28]<br>Clancy 2003b[29]                                   | Diabetes (Type 2)              | USA       | University Primary Care Center serving uninsured or inadequately insured patients        | 120             | CHCC model-'group visits'          | Usual care                                                                |
| <b>Clancy (2007a)</b> [30]<br>Clancy (2007b)[31]<br>Clancy 2008[32]            | Diabetes (Type 2)              | USA       | University Primary Care Center serving mainly minority, inadequately insured patients    | 186             | CHCC model-'group visits'          | Usual care                                                                |
| Cole (2013)[33]                                                                | Diabetes (Prediabetes)         | USA       | Military health system                                                                   | 65              | SMA                                | Individual counselling                                                    |
| Drake (2018)[34]                                                               | Diabetes (Type 2)              | USA       | Family medicine centre                                                                   | 33              | SMA + personalised health planning | SMA                                                                       |
| Ee (2020)[35]                                                                  | Diabetes (Type 2)              | Australia | University primary care center                                                           | 18              | SMA                                | Usual care                                                                |
| Liu (2012)[36]                                                                 | Diabetes (Type 2)              | China     | General practices                                                                        | 208             | CHCC model-'group visits'          | Usual care                                                                |
| Naik (2011)[37]                                                                | Diabetes (Type 2)              | USA       | Veterans Affairs Medical Centres                                                         | 87              | Group clinic                       | **Enhanced usual care                                                     |
| <b>Schillinger (2008)</b> [38]<br>Schillinger (2009)[39]<br>Wallace (2013)[40] | Diabetes (Type 2)              | USA       | University affiliated-Safety net settings- community health network                      | 339             | Group medical visit                | Automated telephone self-management                                       |
| Vaughan (2017)[41]                                                             | Diabetes (Prediabetes/ Type 2) | USA       | Community health clinic serving low-income Hispanic adults                               | 62              | Group visit                        | Usual care<br>After 6 months, the control group received the intervention |
| Vaughan (2020)[42]                                                             | Diabetes (Type 2)              | USA       | Community health clinic serving low-income Hispanic adults                               | 89              | Group visits                       | Usual care                                                                |

|                                                                                               |                                           |         |                                                               |      |                                  |                                      |
|-----------------------------------------------------------------------------------------------|-------------------------------------------|---------|---------------------------------------------------------------|------|----------------------------------|--------------------------------------|
| Wagner (2001)[43]                                                                             | Diabetes (Type 1 & 2)                     | USA     | Primary care practices in health maintenance organisation     | 708  | Chronic care clinic              | Usual care                           |
| Cohen (2011)[44]                                                                              | Diabetes (Type 2) and cardiovascular risk | USA     | Veterans Association Medical Center                           | 99   | SMA programme (2 phases)         | Usual care                           |
| Taveira (2014)[45]                                                                            | Diabetes and cardiovascular risk          | USA     | Veterans Association Medical Center                           | 200  | Group medical visit              | CRRC Individual clinic<br>Usual care |
| Wu (2018)[46]                                                                                 | Diabetes (Type 2) and cardiovascular risk | USA     | Veterans Health Administration Hospital primary care services | 250  | Group medical visit              | Usual care                           |
| Taveira (2011)[47]                                                                            | Diabetes (Type 2) and depression          | USA     | Veterans Affairs Medical Centres                              | 88   | SMA/ Group medical appointment   | Usual care                           |
| <b>Yancy (2020)[48]</b><br>Crowley (2017)[49]                                                 | Diabetes (Type 2) and overweight          | USA     | Veterans Association Medical Center                           | 263  | Group medical visit with IWM     | Group medical visit                  |
| <b>Edelman (2010)[50]</b><br>Crowley (2013)[51]<br>Crowley (2014)[52]<br>Eisenberg (2019)[53] | Diabetes (Type 2) and hypertension        | USA     | Veterans Association Medical Center                           | 239  | Group clinic                     | Usual care                           |
| Gao (2015)[54]                                                                                | Hypertension                              | China   | Community Health Care Centre                                  | 1346 | CHCC model+ 'group visits'       | Usual care                           |
| Simon (2015)[55]                                                                              | Hypertension                              | Germany | Physician practices                                           | 48   | CHCC model 'group medical visit' | Usual care                           |
| Baqir (2020)[56]                                                                              | Osteoporosis                              | UK      | General practices                                             | 158  | Group consultation               | Usual care                           |

278  
279  
280

Multiple papers for the same trial were found therefore we bolded the one used as the index paper throughout the rest of the paper. ^Chronic conditions (including asthma, COPD, heart failure, diabetes, arthritis, deafness, blindness). \*\*Enhanced usual care- patients required to attend 2 diabetes group education sessions. CRRC- Cardiovascular Risk Reduction Clinic, IWM- intensive weight management, SM- Self-management, SMA- Shared medical appointment, UC- usual care.

281 Fifteen trials (70%) were for a single LTC, of these: 12 were for diabetes[27,29,30,33–  
282 38,41–43], two for hypertension[54,55]; and one was for osteoporosis[56]. Eight trials  
283 considered multiple LTCs: three were diabetes and hypertension/cardiovascular risk[44–  
284 46,50]; one was diabetes and depression[47], one was for overweight patients with diabetes  
285 [48]; one was chronic pain and depression[26]; and one included multiple LTCs including:  
286 arthritis, hypertension, cancer, deafness and diabetes[23]. Overall, 20/23 (87%) of trials  
287 focused on patients with diabetes.

288

289 Eighteen trials (83%) were conducted in the US[23,26,27,29,30,33,34,37,38,41–48,50], two  
290 in China[36,54] and one each in Australia[35], Germany[55] and the UK[56]. Eleven trials  
291 were measured the effectiveness, impact or efficacy of SMAs compared to usual  
292 care[23,26,27,30,33,36,37,42,43,46,50], Eight trials examined feasibility  
293 parameters[28,34,35,38,41,42,47,54], and two trials were non-inferiority/superiority  
294 trials[48,49,56].

295

296 In eight trials (35%) participants were veterans or military personnel[33,37,44–48,50].  
297 Participants were from low-income communities in four trials[26,27,41,42], and uninsured  
298 communities in three US trials[29,30,38]. Two trials were tailored for non-English speaking  
299 participants, where written materials were available in Spanish[38,42]. The majority of  
300 participants were over 50 years old, the mean age of participants ranged between  
301 50.5[25,26] to 74 years old[56]. Two trials were specifically for older patients over 55 or 60  
302 years respectively[23,55], and two trials excluded patients over 75[48] and 80 years[36].  
303 Twelve trials (52%) had a majority of female participants[23,27,28,36,41,42,54,56]. Ten trials  
304 had majority of male participants[33–35,37,44–48,50]. One trial did not report the gender  
305 balance of participants[55]. Five studies had a majority White population[26,33,43,46,47], six  
306 trials had a majority Black population[27,29,30,34,48,50], two trials had a majority Hispanic  
307 population[41,42], two trials had a majority Asian population[35,36], and one trial had a  
308 majority White-Latino population [38]. Five studies did not report the ethnicity of  
309 participants[23,44,54–56].

310

311 Most trials ( $n=17$ , 78%) had a two-arm design that compared SMAs with usual care, typically  
312 a one-to-one (1:1) appointment with primary care physician[23,26,27,29,30,35,36,41–  
313 47,50,54,56]. In three other two-arm trials, the comparator was a 1:1 appointment plus two  
314 diabetes group education sessions[37], an SMA without an integrated weight management  
315 programme[48] or an SMA with a personal health planning component (PHP)[34]. Two trials  
316 had a delayed six-month waitlist control design[41,42]. Two trials had a three-arm design:  
317 one examined the effectiveness of a cardiovascular risk reduction clinic compared with

318 group medical visits and usual care[45]; and a second compared an automated telephone  
319 self-management service with SMAs and usual care[38]. Where descriptions of usual care  
320 were available, usual care was delivered by a primary care provider, typically a physician/GP  
321 or nurse practitioner [57–62]and, in some cases, a pharmacist [62,63]or dietician [64]. A  
322 review of medication and chronic disease monitoring (e.g., measures of blood pressure and  
323 HbA1c) commonly took place in these sessions [58,59,63,65,66]. In some of the SMAs for  
324 diabetes, the usual care sessions included some form of individualised diabetes self-  
325 management education[58,62,64] or referrals were made available to see a diabetes  
326 educator dietician [59,67].

327

### 328 **SMA components and mode of delivery**

329 There was much variation in the SMAs models reported by studies (see S9 for detailed  
330 description). Key features of SMA models were: facilitated group discussion or group  
331 question and answer session (15 trials)[19,22,25,26,29,30,32–34,37–39,40,43,46,50], ‘group  
332 education’ (14 trials)[19,23,25,31–33,37,38,42,43,44,46,50], and the opportunity to socialise  
333 (11 trials)[19,22,25,26,29,32,34,37,38,46,50].

334

335 SMAs were delivered face-to-face in all trials, although three SMA models included digital  
336 technologies, namely website and telephone support[26] and phone calls or text message  
337 support and/or reminders[41,42]. In three trials[37,45,56] SMAs were delivered by a single  
338 healthcare professional though mostly they were delivered by multidisciplinary teams.  
339 Professionals most commonly involved were family physicians[23,27,28,34–  
340 38,43,48,50,54,55], nurse practitioners[27,30–33,36,48,49] or nurses[23,24,43,44,46,50–  
341 54]. It was not always possible to tell what role each member of staff had in the delivery of  
342 the SMA. Provider characteristics other than profession or role were rarely reported, though  
343 two trials involving a majority Hispanic/Latino participants reported that the community health  
344 worker and or physician were bilingual[38,42]. Four trials reported that the same  
345 interventionists attended all visits for a particular group[44,48,50,55]. One trial of diabetes  
346 SMAs reported that group assignments were maintained for all SMAs to facilitate peer  
347 interactions and relationships within groups[37]. The consistency in group composition in  
348 terms of patient and interventionists attending each session was not reported by most  
349 studies.

350

351 Trial outcome measures varied across trials though most included biomedical indicators,  
352 psychological and well-being measures, healthcare service use and cost and resource use.  
353 Full details of all outcome measures reported by the studies are presented in S4.

354

355

### 356 **Risk of bias**

357 Risk of bias item across the studies was generally low across the items, except for 'Blinding  
358 of participants and personnel' (83% of trials high, 17% unclear) (See S5).

359

360 Sensitivity analyses

361 There were no differences for any of the outcomes according to the risk of bias assessment  
362 criteria relating to random sequence generation, allocation concealment, blinding,  
363 incomplete outcome data, and selected reporting (see S5).

364

### 365 **Effectiveness of SMAs**

366

367 Biomedical indicators

368

369 *Glycated haemoglobin A1C (HbA1c) (%)*

370 Of the 14 trials measuring HbA1c (%) which compared SMA to usual care, nine  
371 trials[27,30,35,38,42,45–47] were included in a meta-analysis. No statistically significant  
372 difference between SMAs and usual care was found for HbA1c (%) at follow-up ( $d=-0.098$ ,  
373  $95\%CI = -0.34, 0.14, n=9$ ) ( $p=0.420$ ) (see Figure 2a). Substantial heterogeneity was  
374 observed ( $I^2 = 70.9\%$ ). Of four other SMA trials reporting HbA1c (%) but not in the meta-  
375 analysis[29,43,44,50], only one reported significant between group differences, whereby the  
376 SMA group had significantly higher odds of attaining HbA1c goals (< 7%) compared to usual  
377 care[27]. However, this was a high risk of bias study, scoring 'unclear' across the six  
378 domains.

379

380 *Diastolic blood pressure*

381 Of 11 studies which reported diastolic blood pressure (DBP)[27,30,33–  
382 36,38,41,42,45,50,54], eight were included in meta-analysis[27,33,35,38,41,42,45,54]. A  
383 very small statistically significant pooled effect was found at follow-up ( $d=-0.123, 95\%CI = -$   
384  $0.22, -0.03, n=8$ ) ( $p=0.008$ ), whereby participants in the SMA group had lower DBP than  
385 those in usual care (see Figure 2b).

386

387 Of the three studies not included in the meta-analysis[30,36,50], one trial of SMAs for  
388 diabetes and hypertension reported that mean DBP was lower in the SMA group (78.3  
389 mmHg) than in the usual care group (82.1 mmHg) at 12 months[50].

390

391 *Systolic blood pressure*

392 Of 13 trials reporting SBP[27,30,33,35,36,38,41,42,44–46,50,54], nine could be meta-  
393 analysed[27,33,35,38,41,42,45,46,54]. No statistically significant difference between SMAs  
394 and usual care was found for SBP at follow-up ( $d=-0.018$ ,  $95\%CI = -0.11, 0.08$ ,  $n=9$ )  
395 ( $p=0.709$ ), with lows level of heterogeneity observed ( $I^2 = 3.8\%$ ) (see Figure 2c). Of the four  
396 trials not in the meta-analysis[30,36,44,50], two moderately robust studies reported  
397 statistically significant between group differences in SBP at follow-up[36,50], whereby the  
398 SMA group showed greater decreases in SBP compared to usual care.

399  
400 No statistically significant effect of SMAs compared to usual care was found for other  
401 biomedical health outcomes including: total cholesterol, high density lipoprotein cholesterol,  
402 low-density lipoprotein cholesterol, triglycerides, weight, and BMI (see S6).

403

#### 404 *Trials with non-usual care comparators*

405 Three trials had enhanced SMAs as their comparator[34,37,48], all of which found greater  
406 reductions in the enhanced SMA group compared to the standard SMA group [64,68,69].  
407 Drake et al. (2018) reported that there significantly greater improvements in HbA1c (%) were  
408 observed in the PHP SMA group compared to the standard SMA group at follow-up[68].  
409 Naik et al. (2011) found that HbA1c (%) was significantly lower in the SMA group than the  
410 traditional diabetes group education group immediately following the active interventions at  
411 three months, and the between group differences remained clinically and statistically  
412 significant at one year follow-up[64]. Yancy et al. (2020) found that the mean reduction in  
413 HbA1c (%) was significantly greater in the enhanced SMA group compared to the standard  
414 GMV group at 16 and 32 weeks. However, at 48 weeks, no between group differences in  
415 HbA1c (%) were observed[69].

416

417 Further, Drake et al., (2018) reported that participants in the PHP SMA group had lower DBP  
418 ( $M=86$  mmHg) at 8 months follow-up compared to participants in the standard SMA group  
419 ( $M=79.8$  mmHg)[34]. Yancy et al. (2020) reported patient weight loss in the SMAs with  
420 intensive weight management was comparable to weight loss amongst patients attending  
421 SMAs but statistical significance was unclear[48]. It is possible that other studies could not  
422 detect statistically significant differences between arms due to small sample sizes.

423

424 <Insert Figure 2 a,b,c, here>

425

426 Psychological and well-being measures

427

428 *Quality of life*

429 Six trials reported quality of life (QoL) outcomes[23,26,35,38,44,46] of which two trials  
430 reported significant between group differences[23,38]. One trial of SMAs for chronically ill  
431 patients with multiple LTCs found that participants in the SMA group ( $M=7.2$ ,  $SD=1.8$ )  
432 reported significantly better QoL than the usual care group ( $M=6.3$ ,  $SD=2.0$ ) ( $p=.002$ ) at 24  
433 months[23]. Schillinger et al., (2008) measured QoL using the short form (SF)-12 instrument  
434 which comprised of mental health and physical health subscales. Improvements in SF-12  
435 mental health was observed for SMA group compared to SMA (effect size=0.31,  $p=0.03$ )  
436 and usual care (effect size=0.18,  $p=0.2$ )[38]. However, this was considered as a high risk of  
437 bias study, with high/unclear judgements across four out of six domains.

438

#### 439 *Patient satisfaction*

440 Four trials measured patient satisfaction[23,34,43,56]. Scott et al. (2004) reported significant  
441 differences at follow-up, with SMA patients reporting higher satisfaction with practitioner  
442 discussions compared to controls[23]. The other three studies found no between group  
443 differences.

444

#### 445 *Patient self-efficacy*

446 Self-efficacy was measured in nine trials[23,27,36,38,44,47,50,54], of which five studies  
447 were included in meta-analysis[23,26,27,38,54]. No statistically significant effect was found  
448 ( $d=0.167$ ,  $95\%CI = -0.08, 0.41$ ,  $n=5$ ) ( $p=0.182$ ) (See S7). High levels of heterogeneity were  
449 observed ( $I^2=78.9\%$ ). Of the four other studies not included in meta-analysis[36,44,47,50],  
450 two reported that SMA patients had significant improvements in self-efficacy to manage  
451 diabetes compared to usual care[36,50].

452

453 No statistically significant effect of SMAs compared to usual care was found for other  
454 depression, the only other psychological and well-being measure identified (see S7).

455

#### 456 *Trials with non-usual care comparator*

457 Drake et al. (2018) reported significant improvements in self-efficacy, as measured using the  
458 Diabetes Empowerment Scale, for the PHP SMA group compared to the standard SMA  
459 group[30]. Naik et al. (2011) did not find any differences in diabetes self-efficacy scores  
460 between the SMA group and the traditional diabetes group education group[37].

461

#### 462 *Healthcare service utilisation*

463

#### 464 *Hospital admissions*

465 Seven trials reported hospital admissions within six to 24 months[23,27,29,43,45,47,50] and  
466 three were included in a meta-analysis[23,27,45]. There was no difference between SMAs  
467 and usual care in terms of hospital admissions at follow-up ( $d=-0.016$ ,  $95\%CI = -0.38, 0.35$ ,  
468  $n=3$ ; ( $p=0.931$ ) (see Figure 3a). Substantial heterogeneity was observed ( $I^2 = 71.1\%$ ).

469

470 None of the other four trials[29,43,47,50] reported significant between group differences for  
471 hospital admissions at follow-up.

472

#### 473 *Emergency department use*

474 Of eight relevant trials[23,26,27,29,43,45,47,50], four were included in a meta-  
475 analysis[23,27,43,45]. No difference between SMAs and usual care was found for  
476 admissions to emergency departments at follow-up ( $d=-0.083$ ,  $95\%CI = -0.30, 0.13$ ,  $n=4$ ,  
477  $p=0.453$  (Figure 3b). Considerable heterogeneity was observed ( $I^2 = 61.7\%$ ).

478

479 Of four trials not in the meta-analysis [26,29,47,50], only Edelman et al. (2010) reported  
480 significant between group differences in emergency department use favouring SMAs with  
481 0.4 ( $95\%CI = 0.20, 0.70$ ) fewer emergency care visits than the usual care group over the 12-  
482 month study period [50].

483

#### 484 *Primary care visits*

485 Four trials reported the number of primary care visits participants made during the study  
486 period[23,43,47,50]. Three were pooled in a meta-analysis[23,43,47] showing no statistically  
487 significant difference ( $d=0.034$ ,  $95\%CI = -0.09, 0.16$ ,  $n=3$ ,  $p=0.575$ ) (see Figure 3c).

488

489 Edelman et al. (2010), which could not be included into the meta-analysis, reported that  
490 SMA participants had significantly fewer primary care visits than controls (5.3 vs. 6.2 per  
491 patient-year) at 12 months[50].

492

493 No statistically significant effect of SMAs compared to usual care were found for other  
494 behavioural outcomes including medication adherence and physical activity (see S8)

495

496 <Insert Figure 3a,b,c here>

497

#### 498 *Cost and resource use*

499 Few studies reported the costs involved in the delivery of the SMA and those that did were  
500 unclear about cost parameters (i.e whether scheduling and preparation time was included or  
501 not) or how the costs were attributed. One trial of diabetes SMAs reported that overall costs



502 per patient were higher in SMAs than those in usual care group for the study period of six  
503 months[29]. However, another trial found no significant difference between SMA and usual  
504 care in terms of total costs incurred during the 24 months study period, but showed a  
505 positive effect of the SMA at 13 months post-study where cost decreased by 6% for the SMA  
506 but increased by 13% for usual care  $p < 0.01$ [43]. The SMA trial for osteoporosis reported that  
507 the costs incurred during the study period were lower for the SMA group compared to control  
508 groups[56]. A trial of chronic condition SMAs (reported that total costs incurred by the SMA  
509 group were lower than the usual care group[23].

510

511

## 512 **DISCUSSION**

513 Our systematic review identified 23 unique RCTs comparing SMAs for one or more LTCs to  
514 usual care or an enhanced SMA. We found that SMAs significantly improved diastolic blood  
515 pressure for diabetes patients. In line with the findings of previous reviews[15], no harm was  
516 observed for the use of SMAs across these outcomes and there was not enough evidence of  
517 an effect on healthcare service use compared to usual care. This indicates that whilst SMAs  
518 may not be superior to usual care in terms of most health outcomes or reducing demand on  
519 services, they do not appear to increase demand at least in the short-term. Evidence  
520 reporting costs is too heterogeneous to draw firm conclusions.

521

### 522 **Comparison with previous literature**

523 Like previous reviews of SMAs for LTCs[4,15,70], more than half of the included RCTs  
524 included patients with diabetes, and as such the most commonly reported outcome measure  
525 was HbA1C. However, unlike previous reviews[71,72], we did not observe any significant  
526 improvements in HbA1c. This may be because previous reviews included trials in secondary  
527 care. Our meta-analysis showed that SMA participants had lower DBP compared to patients  
528 who received usual care. [54]

529

530 Previous systematic reviews have been inconclusive with regards to the impact of SMAs on  
531 healthcare utilisation. Edelman et al.'s (2012) review[72] of SMAs for patients with chronic  
532 medical conditions in older adults found a lower pattern of healthcare utilisation, whilst Booth  
533 et al. (2015)[4] reported a mixed pattern of changes. Our meta-analyses show that SMAs do  
534 not differ from usual care in terms of healthcare utilisation. There is no evidence in the  
535 present data to suggest that patients compensate for a lack of privacy by returning to  
536 primary care or that they risk hospitalisation because issues are not adequately addressed  
537 during the SMA session(s). However, it should be noted that the key source of bias across  
538 the included studies was the lack of blinding of participants and personnel. Therefore,

539 possible selection bias may result in recruitment of SMA participants with less concern about  
540 sharing their personal/medical information.

541 In comparison to biomedical outcomes and psychological outcomes, healthcare service use  
542 and costs and resource use and other behavioural outcomes were less frequently reported  
543 by studies. This echoes the findings of Edelman et al. (2015)[46] which found there to be  
544 limited data on key patient-centred outcomes such as patient satisfaction. Behavioural  
545 outcomes such as medication adherence are important across many LTCs and are key to  
546 understanding how patients are self-managing their conditions. In line with Kelly et al.'s  
547 (2017)[12] recommendation, future studies should report outcome effectiveness measures  
548 that are common or comparable across different LTCs such as physical activity, self-  
549 efficacy, medication adherence, and quality of life. It would be advantageous to agree a  
550 Core Outcome Set (COS), consisting of a standardised group of outcomes, to be reported  
551 by all SMA trials. This can help with future evaluations of SMAs through reducing  
552 heterogeneity and facilitating meta-analysis and ensuring that outcome measures are  
553 relevant to key stakeholders[73].

554

#### 555 **Strengths and limitations**

556 Although previous reviews have explored the effectiveness of SMAs in improving health  
557 outcomes, this review provides a focus on primary care which is key to managing LTCs. We  
558 found ten additional trials with 1160 participants since the comprehensive work by Booth et  
559 al. (2015)[4] indicating a rapidly growing field. We used robust methods whereby our search  
560 strategy was developed with input from Information Specialists through an iterative process  
561 and key stages of the review (including screening, data extraction, and quality appraisal)  
562 were undertaken independently by two reviewers. We included studies regardless of type of  
563 LTC so that we were able to summarise all the available evidence on effectiveness of SMAs  
564 for LTCs in primary care in one analysis. However, evidence of an effect was determined by  
565  $p < .0.5$  in the papers. This assumes that studies were adequately powered, which may not  
566 be the case, particularly for some of the secondary outcomes of the included studies.

567

#### 568 **Limitations of evidence base and implications for future research**

569 Despite using a form of delivery framework to extract relevant study information[17], some  
570 important contextual factors, such characteristics of the healthcare professionals delivering  
571 the SMA, may not have been captured as this information was missing from the authors'  
572 descriptions of the SMAs. Similar components may be described differently by different  
573 authors or, conversely, similar descriptions are used to describe different components. Using  
574 standardised taxonomies for describing form of delivery and intervention content when  
575 designing the intervention/SMA content could help to identify important behavioural

576 components and key implementation processes that contribute to intervention effectiveness,  
577 allowing for replication. However, for this to be possible, it is also important that  
578 interventionists clearly specify which target behaviours (e.g. to increase physical activity) the  
579 SMAs aim to change. None of the included studies included measures of fidelity which is  
580 also important for determining whether the session(s) are delivered as intended to achieve  
581 optimum effects[74]. Further, theoretical underpinnings were lacking in the included SMA  
582 interventions, making it difficult to identify ‘mechanisms of action’ through which  
583 interventions bring about change[75]. Future SMAs interventions should be theory-based  
584 and be explicit in reporting its theoretical underpinnings.

585

586 Where multiple healthcare professionals are involved in the SMA, their key role and purpose  
587 in the SMA were rarely clearly defined. There was also limited reporting on the composition  
588 of the SMA groups across some of the included studies (i.e. how patients were selected for  
589 recruitment and size). Therefore, it is unclear which groups of patients might benefit from  
590 attending the same SMAs together and what implications SMAs may have for intervention-  
591 generated health inequalities. One third of the included studies were conducted on US  
592 veterans and one third of studies have involved participants from low-income/uninsured  
593 population groups. Generalisability of these groups to other healthcare settings in other  
594 countries is unclear. There needs to be further examination into how SMAs have been  
595 implemented into typical NHS practice. It was envisaged that “they are not an addition to  
596 one-to-one appointments – they replace them.” (p.65, Clay & Stern, 2015). However, there is  
597 anecdotal evidence that SMAs are being used in addition to usual care models of chronic  
598 disease management rather than as replacements. Further investigations into SMAs for  
599 patients with one or more LTCs is required, including a wider variety of LTCs (such as  
600 asthma and chronic obstructive pulmonary disease) and with more diverse population  
601 groups. For example, including low-income and disadvantaged groups in other countries,  
602 including the UK.

603

## 604 **Conclusions**

605 This review is the first to examine the effects of SMAs delivered in primary care on health  
606 outcomes and healthcare service use in patients with one or more LTCs. Our review  
607 suggests that SMAs are unlikely to result in less favourable outcomes to patients with LTCs  
608 compared to usual care. To identify key intervention components that contribute to  
609 effectiveness, future studies will benefit from using standardised taxonomies to report  
610 intervention content. The use of an evaluation framework, with a core outcome set, is  
611 recommended to improve evidence in this field.

612

613  
614  
615  
616  
617  
618  
619  
620  
621  
622  
623  
624  
625  
626  
627  
628  
629  
630  
631  
632  
633  
634  
635  
636  
637  
638  
639  
640  
641  
642  
643  
644  
645  
646  
647  
648  
649  
650  
651  
652  
653  
654  
655  
656  
657  
658  
659  
660  
661  
662  
663  
664  
665  
666  
667

### **AUTHOR CONTRIBUTIONS**

EK and FS designed the study. MYT, FG, CR, and FB developed the search strategy and undertook the searches. FG and MYT carried out the screening, data extraction, and analysis. All authors contributed to the interpretation. MYT and FG wrote the manuscript that all authors contributed to and approved.

### **ACKNOWLEDGMENTS**

We would like to thank the PRU BehSci Public Patient Involvement group for providing their patient perspective about outcome measures of interests. Professor Kaner is supported via an NIHR Senior Investigator award.

### **ETHICS STATEMENT**

Ethical approval was not required due to the present study being a systematic review.

### **AVAILABILITY OF DATA**

As this study is a systematic review, all data reported has been previously published and is in the public domain.

### **SUPPLEMENTARY MATERIAL**

PROSPERO PROTOCOL

PRISMA checklist

Supplementary File 1- Search strategy for Ovid MEDLINE

Supplementary File 2- Data Extraction Form

Supplementary File 3- List of included peer-reviewed papers

Supplementary File 4- Outcomes reported by studies

Supplementary File 5- Quality assessment of included studies with sensitivity analyses

Supplementary File 6- Additional biomedical measures examined with forest plots

Supplementary File 7- Additional psychological and well-being measures examined with forest plots

Supplementary File 8- Additional behavioural outcomes examined with forest plots

Supplementary File 9- SMA delivery, dose and components

668  
669  
670  
671  
672  
673  
674  
675  
676  
677  
678  
679  
680  
681  
682  
683  
684  
685  
686  
687  
688  
689  
690  
691  
692  
693  
694  
695  
696  
697  
698  
699  
700  
701  
702  
703  
704  
705  
706  
707  
708  
709  
710  
711  
712  
713  
714  
715  
716  
717  
718  
719  
720  
721  
722

## REFERENCES

- 1 Clay H, Stern R. Making time in general practice: freeing GP capacity by reducing bureaucracy and avoidable consultations, managing the interface with hospitals and exploring new ways of working. 2015.
- 2 Hayhoe B, Verma A, Kumar S. Shared medical appointments. *BMJ (Online)* 2017;**358**:10–1. doi:10.1136/bmj.j4034
- 3 Jones T, Darzi A, Egger G, *et al.* Process and Systems: A systems approach to embedding group consultations in the NHS. *Future Healthcare Journal* 2019;**6**:8–16. doi:10.7861/futurehosp.6-1-8
- 4 Booth A, Cantrell A, Preston L, *et al.* What is the evidence for the effectiveness, appropriateness and feasibility of group clinics for patients with chronic conditions? A systematic review. *Health Services and Delivery Research* 2015;**3**:1–194. doi:10.3310/hsdr03460
- 5 Clay H, Stern R. Making Time in General Practice. 2015. [https://www.primarycarefoundation.co.uk/images/PrimaryCareFoundation/Downloading\\_Reports/PCF\\_Press\\_Releases/Making-Time-in-General-Practice\\_FULL\\_REPORT\\_28\\_10\\_15.pdf](https://www.primarycarefoundation.co.uk/images/PrimaryCareFoundation/Downloading_Reports/PCF_Press_Releases/Making-Time-in-General-Practice_FULL_REPORT_28_10_15.pdf)
- 6 Wadsworth KH, Archibald TG, Payne AE, *et al.* Shared medical appointments and patient-centered experience: A mixed-methods systematic review. *BMC Family Practice* 2019;**20**:1–13. doi:10.1186/s12875-019-0972-1
- 7 Graham F, Tang MY, Jackson K, *et al.* Barriers and facilitators to implementation of shared medical appointments in primary care for the management of long-term conditions: a systematic review and synthesis of qualitative studies. *BMJ Open* 2021;**11**:e046842. doi:10.1136/bmjopen-2020-046842
- 8 Edelman D, Gierisch JM, McDuffie JR, *et al.* Shared Medical Appointments for Patients with Diabetes Mellitus: A Systematic Review. *Journal of General Internal Medicine* 2015;**30**:99–106. doi:10.1007/s11606-014-2978-7
- 9 Booth A, Cantrell A, Preston L, *et al.* What is the evidence for the effectiveness, appropriateness and feasibility of group clinics for patients with chronic conditions? A systematic review. *Health Services and Delivery Research* 2015;**3**:1–194. doi:10.3310/hsdr03460
- 10 Higgins J, Thomas J, Chandler J, *et al.* Systematic Reviews of Interventions. In: Deeks J, Higgins J, Altman D, eds. *Cochrane Handbook for Systematic Reviews of Interventions version 6.2 (updated February 2021)*. 2021.
- 11 Page MJ, McKenzie JE, Bossuyt PM, *et al.* The PRISMA 2020 statement: An updated guideline for reporting systematic reviews. *The BMJ* 2021;**372**. doi:10.1136/bmj.n71
- 12 Michie S, Richardson M, Johnston M, *et al.* The behavior change technique taxonomy (v1) of 93 hierarchically clustered techniques: Building an international consensus for the reporting of behavior change interventions. *Annals of Behavioral Medicine* 2013;**46**:81–95. doi:10.1007/s12160-013-9486-6
- 13 Booth A, Cantrell A, Preston L, *et al.* What is the evidence for the effectiveness, appropriateness and feasibility of group clinics for patients with chronic conditions? A systematic review. *Health Services and Delivery Research* 2015;**3**:1–194. doi:10.3310/hsdr03460
- 14 Kirsh SR, Aron DC, Johnson KD, *et al.* A realist review of shared medical appointments: How, for whom, and under what circumstances do they work? *BMC Health Services Research* 2017;**17**:1–13. doi:10.1186/s12913-017-2064-z
- 15 Kelly F, Liska C, Morash R, *et al.* Shared medical appointments for patients with a nondiabetic physical chronic illness: A systematic review. *Chronic Illness* 2019;**15**:3–26. doi:10.1177/1742395317731608
- 16 Veritas Health Innovation. Covidence systematic review software. 2021.

- 723 17 Dombrowski SU, O'Carroll RE, Williams B. Form of delivery as a key 'active  
724 ingredient' in behaviour change interventions. *British Journal of Health Psychology*  
725 2016;**21**:733–40. doi:10.1111/bjhp.12203
- 726 18 Higgins JPT, Altman DG, Gøtzsche PC, *et al.* The Cochrane Collaboration's tool for  
727 assessing risk of bias in randomised trials. *BMJ (Online)* 2011;**343**:1–9.  
728 doi:10.1136/bmj.d5928
- 729 19 Centre for Reviews and Dissemination. CRD's guidance for undertaking reviews in  
730 health care. York: 2009.
- 731 20 Valentine JC, Pigott TD, Rothstein HR. How many studies do you need? A primer on  
732 statistical power for meta-analysis. *Journal of Educational and Behavioral Statistics*  
733 2010;**35**:215–47. doi:10.3102/1076998609346961
- 734 21 Deeks J, Higgins J, Altman D. Analysing data and undertaking meta-analyses. In:  
735 Higgins J, Thomas J, Chandler J, *et al.*, eds. *Cochrane Handbook for Systematic*  
736 *Reviews of Interventions*. Cochrane 2021.
- 737 22 Popay J, Roberts H, Sowden A, *et al.* Guidance on the Conduct of Narrative  
738 Synthesis in Systematic Reviews A Product from the ESRC Methods Programme  
739 Peninsula Medical School, Universities of Exeter and Plymouth. 2006.
- 740 23 Scott JC, Conner DA, Venohr I, *et al.* Effectiveness of a group outpatient visit model  
741 for chronically ill older health maintenance organization members: A 2-year  
742 randomized trial of the Cooperative Health Care Clinic. *J Am Geriatr Soc*  
743 2004;**52**:1463–70. doi:10.1111/j.1532-5415.2004.52408.x
- 744 24 Coleman EA, Eilertsen TB, Kramer AM, *et al.* Reducing emergency visits in older  
745 adults with chronic illness. A randomized, controlled trial of group visits. *Eff Clin Pract*  
746 2001;**4**:49–57.
- 747 25 Gardiner P, Lestoquoy AS, Gergen-Barnett K, *et al.* Design of the integrative medical  
748 group visits randomized control trial for underserved patients with chronic pain and  
749 depression. *Contemporary Clinical Trials* 2017;**54**:25–35.  
750 doi:10.1016/j.cct.2016.12.013
- 751 26 Gardiner P, Luo M, D'Amico S, *et al.* Effectiveness of integrative medicine group visits  
752 in chronic pain and depressive symptoms: A randomized controlled trial. *PLoS ONE*  
753 2019;**14**:1–20. doi:10.1371/journal.pone.0225540
- 754 27 Berry DC, Williams W, Hall EG, *et al.* Imbedding Interdisciplinary Diabetes Group  
755 Visits Into a Community-Based Medical Setting. *The Diabetes Educator* 2016;**42**:96–  
756 107. doi:10.1177/0145721715620022
- 757 28 Clancy DE, Cope DW, Magruder K, *et al.* Evaluating group visits in an uninsured or  
758 inadequately insured patient population with uncontrolled type 2 diabetes. *Diabetes*  
759 *Educ* 2003;**29**:292–203. doi:10.1177/0145721707299266
- 760 29 Clancy DE, Cope DW, Magruder KM, *et al.* Evaluating concordance to American  
761 Diabetes Association standards of care for type 2 diabetes through group visits in an  
762 uninsured or inadequately insured patient population. *Diabetes Care* 2003;**26**:2032–6.  
763 doi:10.2337/diacare.26.7.2032
- 764 30 Clancy DE, Huang P, Okonofua E, *et al.* Group visits: Promoting adherence to  
765 diabetes guidelines. *Journal of General Internal Medicine* 2007;**22**:620–4.  
766 doi:10.1007/s11606-007-0150-3
- 767 31 Clancy DE, Yeager DE, Huang P, *et al.* Further evaluating the acceptability of group  
768 visits in an uninsured or inadequately insured patient population with uncontrolled  
769 type 2 diabetes. *Diabetes Educ* 2007;**33**:309–14. doi:10.1177/0145721707299266
- 770 32 Clancy DE, Dismuke CE, Magruder KM, *et al.* Do Diabetes Group Visits Lead to  
771 Lower Medical Care Charges? *American Journal of Managed Care* 2008;**14**:39–44.
- 772 33 Cole RE, Boyer KM, Spanbauer SM, *et al.* Effectiveness of Prediabetes Nutrition  
773 Shared Medical Appointments: Prevention of Diabetes. *The Diabetes Educator*  
774 2013;**39**:344–53. doi:10.1177/0145721713484812
- 775 34 Drake C, Meade C, Hull SK, *et al.* Integration of Personalized Health Planning and  
776 Shared Medical Appointments for Patients with Type 2 Diabetes Mellitus. *Southern*  
777 *Medical Journal* 2018;**111**:674–82. doi:10.14423/SMJ.0000000000000892

- 778 35 Ee C, de Courten B, Avarad N, *et al.* Shared Medical Appointments and Mindfulness  
779 for Type 2 Diabetes—A Mixed-Methods Feasibility Study. *Frontiers in Endocrinology*  
780 2020;**11**:1–16. doi:10.3389/fendo.2020.570777
- 781 36 Liu S, Bi A, Fu D, *et al.* Effectiveness of using group visit model to support diabetes  
782 patient self-management in rural communities of Shanghai: A randomized controlled  
783 trial. *BMC Public Health* 2012;**12**:1. doi:10.1186/1471-2458-12-1043
- 784 37 Naik AD, Palmer N, Petersen NJ, *et al.* Comparative effectiveness of goal setting in  
785 diabetes mellitus group clinics: Randomized clinical trial. *Archives of Internal Medicine*  
786 2011;**171**:453–9. doi:10.1001/archinternmed.2011.70
- 787 38 Schillinger D, Hammer H, Wang F, *et al.* Seeing in 3-D: Examining the reach of  
788 diabetes self-management support strategies in a public health care system. *Health*  
789 *Education and Behavior* 2008;**35**:664–82. doi:10.1177/1090198106296772
- 790 39 Schillinger D, Handley M, Wang F, *et al.* Effects of self-management support on  
791 structure, process, and outcomes among vulnerable patients with diabetes: a 3-arm  
792 randomized trial. *Diabetes Care* 2009;**32**. doi:10.2337/dc08-0787.Clinical
- 793 40 Wallace A, Perkhounkova Y, Tseng H, *et al.* Influence of patient characteristics on  
794 assessment of diabetes self-management support. *Nursing Research* 2013;**62**:106–  
795 14. doi:10.1097/NNR.0b013e3182843b77
- 796 41 Vaughan EM, Johnston CA, Cardenas VJ, *et al.* Integrating CHWs as Part of the  
797 Team Leading Diabetes Group Visits: A Randomized Controlled Feasibility Study.  
798 *Diabetes Educator* 2017;**43**:589–99. doi:10.1177/0145721717737742
- 799 42 Vaughan EM, Hyman DJ, Naik AD, *et al.* A Telehealth-supported, Integrated care with  
800 CHWs, and MEdication-access (TIME) Program for Diabetes Improves HbA1c: a  
801 Randomized Clinical Trial. *Journal of General Internal Medicine* Published Online  
802 First: 2020. doi:10.1007/s11606-020-06017-4
- 803 43 Wagner EH, Grothaus LC, Sandhu N, *et al.* Chronic care clinics for diabetes in  
804 primary care: A system-wide randomized trial. *Diabetes Care* 2001;**24**:695–700.  
805 doi:10.2337/diacare.24.4.695
- 806 44 Cohen LB, Taveira TH, Khatana SAM, *et al.* Pharmacist-Led Shared Medical  
807 Appointments for Multiple Cardiovascular Risk Reduction in Patients With Type 2  
808 Diabetes. *The Diabetes Educator* 2011;**37**:801–12. doi:10.1177/0145721711423980
- 809 45 Taveira TH, Wu WC. Interventions to maintain cardiac risk control after discharge  
810 from a cardiovascular risk reduction clinic: A randomized controlled trial. *Diabetes*  
811 *Research and Clinical Practice* 2014;**105**:327–35. doi:10.1016/j.diabres.2014.05.013
- 812 46 Wu WC, Taveira TH, Jeffery S, *et al.* Costs and effectiveness of pharmacist-led group  
813 medical visits for type-2 diabetes: A multi-center randomized controlled trial. *PLoS*  
814 *ONE* 2018;**13**:1–14. doi:10.1371/journal.pone.0195898
- 815 47 Taveira TH, Dooley AG, Cohen LB, *et al.* Pharmacist-Led Group Medical  
816 Appointments for the Management of Type 2 Diabetes with Comorbid Depression in  
817 Older Adults. *Annals of Pharmacotherapy* 2011;**45**:1346–55. doi:10.1345/aph.1Q212
- 818 48 Yancy WS, Crowley MJ, Dar MS, *et al.* Comparison of Group Medical Visits  
819 Combined with Intensive Weight Management vs Group Medical Visits Alone for  
820 Glycemia in Patients with Type 2 Diabetes: A Noninferiority Randomized Clinical Trial.  
821 *JAMA Internal Medicine* 2020;**180**:70–9. doi:10.1001/jamainternmed.2019.4802
- 822 49 Crowley MJ, Edelman D, Voils CI, *et al.* Jump starting shared medical appointments  
823 for diabetes with weight management: Rationale and design of a randomized  
824 controlled trial. *Contemporary Clinical Trials* 2017;**58**:1–12.  
825 doi:10.1016/j.cct.2017.04.004
- 826 50 Edelman D, Fredrickson SK, Melnyk SD, *et al.* Medical Clinics Versus Usual Care for  
827 Patients With Both Diabetes. *Annals of Internal Medicine* 2010;**152**:689–96.
- 828 51 Crowley MJ, Melnyk SD, Coffman CJ, *et al.* Impact of baseline insulin regimen on  
829 glycemic response to a group medical clinic intervention. *Diabetes Care*  
830 2013;**36**:1954–60. doi:10.2337/dc12-1905

- 831 52 Crowley MJ, Melnyk SD, Ostroff JL, *et al.* Can group medical clinics improve lipid  
832 management in diabetes? *American Journal of Medicine* 2014;**127**:145–51.  
833 doi:10.1016/j.amjmed.2013.09.027
- 834 53 Eisenberg A, Crowley MJ, Coffman C, *et al.* Effect of a group medical clinic for  
835 veterans with diabetes on body mass index. *Chronic Illness* 2019;**15**:187–96.  
836 doi:10.1177/1742395317753885
- 837 54 Gao J, Yang L, Junming D, *et al.* Evaluation of group visits for Chinese hypertensives  
838 based on primary health care center. *Asia-Pacific Journal of Public Health*  
839 2015;**27**:NP350–60. doi:10.1177/1010539512442566
- 840 55 Simon B, Sawicki PT. Quality improvement in chronic care delivery for patients with  
841 arterial hypertension through Group Medical Visits: Patient acceptance and  
842 attendance in the German pilot project. *Quality in Primary Care* 2015;**23**:106-112 7p.
- 843 56 Baqir W, Gray WK, Blair A, *et al.* Osteoporosis group consultations are as effective as  
844 usual care: Results from a non-inferiority randomized trial. *Lifestyle Medicine*  
845 2020;**1**:1–9. doi:10.1002/lim2.3
- 846 57 Gardiner P, Luo M, D'Amico S, *et al.* Effectiveness of integrative medicine group visits  
847 in chronic pain and depressive symptoms: A randomized controlled trial. *PLoS ONE*  
848 2019;**14**:1–20. doi:10.1371/journal.pone.0225540
- 849 58 Berry DC, Williams W, Hall EG, *et al.* Imbedding Interdisciplinary Diabetes Group  
850 Visits Into a Community-Based Medical Setting. *The Diabetes Educator* 2016;**42**:96–  
851 107. doi:10.1177/0145721715620022
- 852 59 Clancy DE, Cope DW, Magruder K, *et al.* Evaluating group visits in an uninsured or  
853 inadequately insured patient population with uncontrolled type 2 diabetes. *Diabetes*  
854 *Educ* 2003;**29**:292–203. doi:10.1177/0145721707299266
- 855 60 Clancy DE, Huang P, Okonofua E, *et al.* Group visits: Promoting adherence to  
856 diabetes guidelines. *Journal of General Internal Medicine* 2007;**22**:620–4.  
857 doi:10.1007/s11606-007-0150-3
- 858 61 Ee C, de Courten B, Avarid N, *et al.* Shared Medical Appointments and Mindfulness  
859 for Type 2 Diabetes—A Mixed-Methods Feasibility Study. *Frontiers in Endocrinology*  
860 2020;**11**:1–16. doi:10.3389/fendo.2020.570777
- 861 62 Vaughan EM, Hyman DJ, Naik AD, *et al.* A Telehealth-supported, Integrated care with  
862 CHWs, and MEdication-access (TIME) Program for Diabetes Improves HbA1c: a  
863 Randomized Clinical Trial. *Journal of General Internal Medicine* Published Online  
864 First: 2020. doi:10.1007/s11606-020-06017-4
- 865 63 Baqir W, Gray WK, Blair A, *et al.* Osteoporosis group consultations are as effective as  
866 usual care: Results from a non-inferiority randomized trial. *Lifestyle Medicine*  
867 2020;**1**:1–9. doi:10.1002/lim2.3
- 868 64 Naik AD, Palmer N, Petersen NJ, *et al.* Comparative effectiveness of goal setting in  
869 diabetes mellitus group clinics: Randomized clinical trial. *Archives of Internal Medicine*  
870 2011;**171**:453–9. doi:10.1001/archinternmed.2011.70
- 871 65 Liu S, Bi A, Fu D, *et al.* Effectiveness of using group visit model to support diabetes  
872 patient self-management in rural communities of Shanghai: A randomized controlled  
873 trial. *BMC Public Health* 2012;**12**:1. doi:10.1186/1471-2458-12-1043
- 874 66 Crowley MJ, Melnyk SD, Coffman CJ, *et al.* Impact of baseline insulin regimen on  
875 glycemic response to a group medical clinic intervention. *Diabetes Care*  
876 2013;**36**:1954–60. doi:10.2337/dc12-1905
- 877 67 Taveira TH, Wu WC. Interventions to maintain cardiac risk control after discharge  
878 from a cardiovascular risk reduction clinic: A randomized controlled trial. *Diabetes*  
879 *Research and Clinical Practice* 2014;**105**:327–35. doi:10.1016/j.diabres.2014.05.013
- 880 68 Drake C, Meade C, Hull SK, *et al.* Integration of Personalized Health Planning and  
881 Shared Medical Appointments for Patients with Type 2 Diabetes Mellitus. *Southern*  
882 *Medical Journal* 2018;**111**:674–82. doi:10.14423/SMJ.0000000000000892
- 883 69 Yancy WS, Crowley MJ, Dar MS, *et al.* Comparison of Group Medical Visits  
884 Combined with Intensive Weight Management vs Group Medical Visits Alone for



- 885 Glycemia in Patients with Type 2 Diabetes: A Noninferiority Randomized Clinical Trial.  
886 *JAMA Internal Medicine* 2020;**180**:70–9. doi:10.1001/jamainternmed.2019.4802  
887 70 Edelman D, McDuffie JR, Oddone E, *et al.* Shared Medical Appointments for Chronic  
888 Medical Conditions: A Systematic Review. *VA Evidence-based Synthesis Program*  
889 *Reports* 2012.  
890 71 Housden L, Wong ST, Dawes M. Effectiveness of group medical visits for improving  
891 diabetes care: a systematic review and meta-analysis. *Canadian Medical Association*  
892 *Journal* 2013;**185**:E635–44. doi:10.1503/cmaj.130053  
893 72 Edelman D, Gierisch JM, McDuffie JR, *et al.* Shared Medical Appointments for  
894 Patients with Diabetes Mellitus: A Systematic Review. *Journal of General Internal*  
895 *Medicine* 2015;**30**:99–106. doi:10.1007/s11606-014-2978-7  
896 73 Webbe J, Sinha I, Gale C. Core Outcome Sets. *Archives of Disease in Childhood:*  
897 *Education and Practice Edition* 2018;**103**:163–6. doi:10.1136/archdischild-2016-  
898 312117  
899 74 Bellg AJ, Resnick B, Minicucci DS, *et al.* Enhancing treatment fidelity in health  
900 behavior change studies: Best practices and recommendations from the NIH Behavior  
901 Change Consortium. *Health Psychology* 2004;**23**:443–51. doi:10.1037/0278-  
902 6133.23.5.443  
903 75 Carey RN, Connell LE, Johnston M, *et al.* Behavior Change Techniques and Their  
904 Mechanisms of Action: A Synthesis of Links Described in Published Intervention  
905 Literature. *Annals of Behavioral Medicine* 2018;**53**:693–707. doi:10.1093/abm/kay078  
906  
907

## 908 **FIGURE LEGENDS**

- 909  
910 Figure 1: PRISMA diagram of study selection process  
911  
912 Figure 2: Forest plot for a) HbA1C(%), b) diastolic blood pressure, c) systolic blood pressure  
913  
914 Figure 3: Forest plot for a) hospital admissions, b) emergency department use, c) primary  
915 care visits
